# Supplementary material
Source: PubMed Central journal article supplement (PMC9386893)
Supplement: NIHMS1620841-supplement-1.pdf [file NIHMS1620841-supplement-1.pdf]

Supporting Information

**A tough, injectable, naturally-derived, and cost-effective composite hydrogel for tissue sealing**

*Maryam Tavafoghi<sup>+</sup>, Amir Sheikhi<sup>+,\*</sup>, Rumeysa Tutar, Jamileh Jahangiry, Avijit Baidya, Reihaneh Haghniaz, Ali Khademhosseini<sup>\*</sup>*

<sup>+</sup>Maryam Tavafoghi and Amir Sheikhi contributed equally to this work.

\*E-mail: sheikhi@psu.edu, khademh@ucla.edu

**Table S1.** Formulation of hybrid hydrogels.

$$\text{VC\% (w/v)} = 0.05 \times [\text{GelMA+AlgMA}]\% \text{ (w/v)}$$

$$\text{TEA\% (w/v)} = 0.075 \times [\text{GelMA+AlgMA}]\% \text{ (w/v)}$$

$$\text{Eosin Y\% (w/v)} = 0.0003 \times [\text{GelMA+AlgMA}]\% \text{ (w/v)}$$

$$\text{CaCl}_2\% \text{ (w/v)} = 0.13 \times \text{AlgMA}\% \text{ (w/v)}$$

| <b>Sample</b> | <b>AlgMA</b>   | <b>GelMA</b>   | <b>VC</b>      | <b>TEA</b>     | <b>Eosin Y</b> | <b>DPBS</b>                | <b>CaCl<sub>2</sub></b> |
|---------------|----------------|----------------|----------------|----------------|----------------|----------------------------|-------------------------|
|               | <b>% (w/v)</b> | <b>(<math>\mu</math>l)</b> | <b>% (w/v)</b>          |
| <b>1</b>      | 0%             | 20%            | 1              | 1.5            | 0.006          | 600                        | 0                       |
| <b>2</b>      | 1%             | 20%            | 1.05           | 1.575          | 0.0063         | 580                        | 0.13                    |
| <b>3</b>      | 2%             | 20%            | 1.1            | 1.65           | 0.0066         | 560                        | 0.27                    |
| <b>4</b>      | 3%             | 20%            | 1.15           | 1.725          | 0.0069         | 540                        | 0.4                     |
| <b>5</b>      | 4%             | 20%            | 1.2            | 1.8            | 0.0072         | 520                        | 0.53                    |
| <b>6</b>      | 5%             | 20%            | 1.25           | 1.875          | 0.0075         | 500                        | 0.67                    |
| <b>7</b>      | 20%            | 0%             | 1              | 1.5            | 0.006          | 600                        | 2.667                   |
| <b>8</b>      | 0%             | 25%            | 1.25           | 1.25           | 0.0075         | 500                        | 0                       |

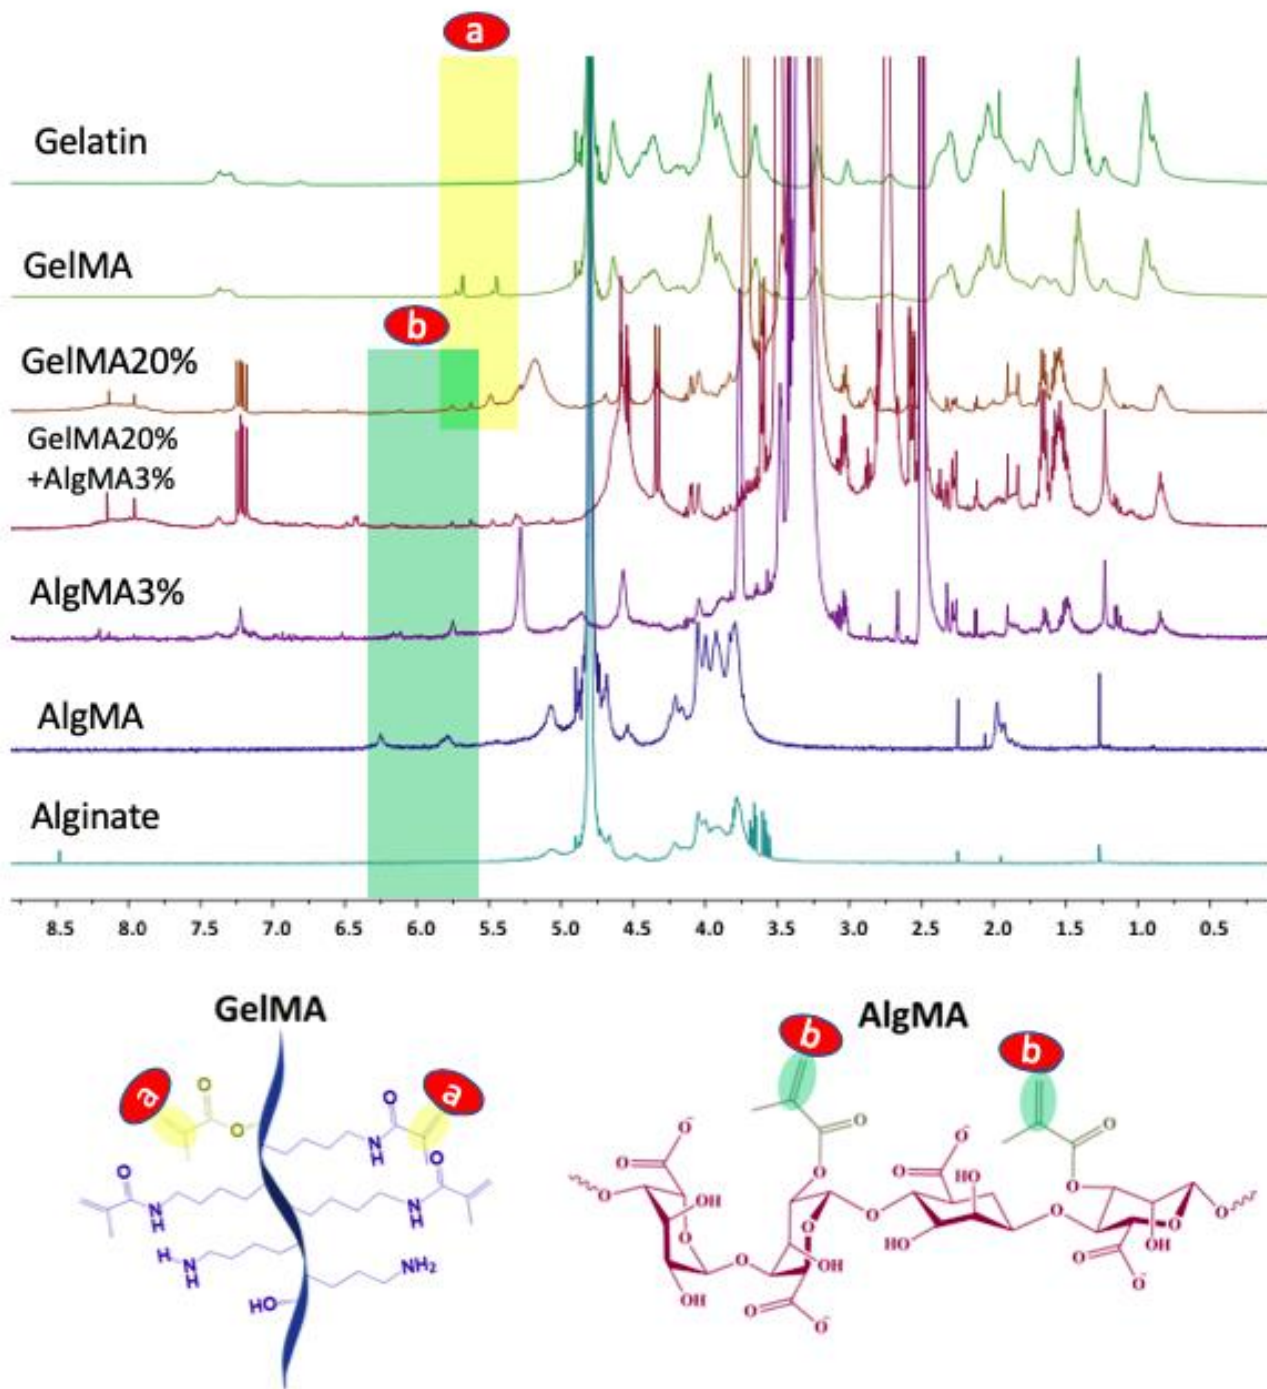

**Figure S1.** <sup>1</sup>H NMR spectra of pre-gel solutions and crosslinked hydrogels. Biopolymers include gelatin, GelMA, crosslinked GelMA (20%), alginate, AlgMA, crosslinked AlgMA (3%), and crosslinked GelMA (20%)-AlgMA (3%) hybrid hydrogels.

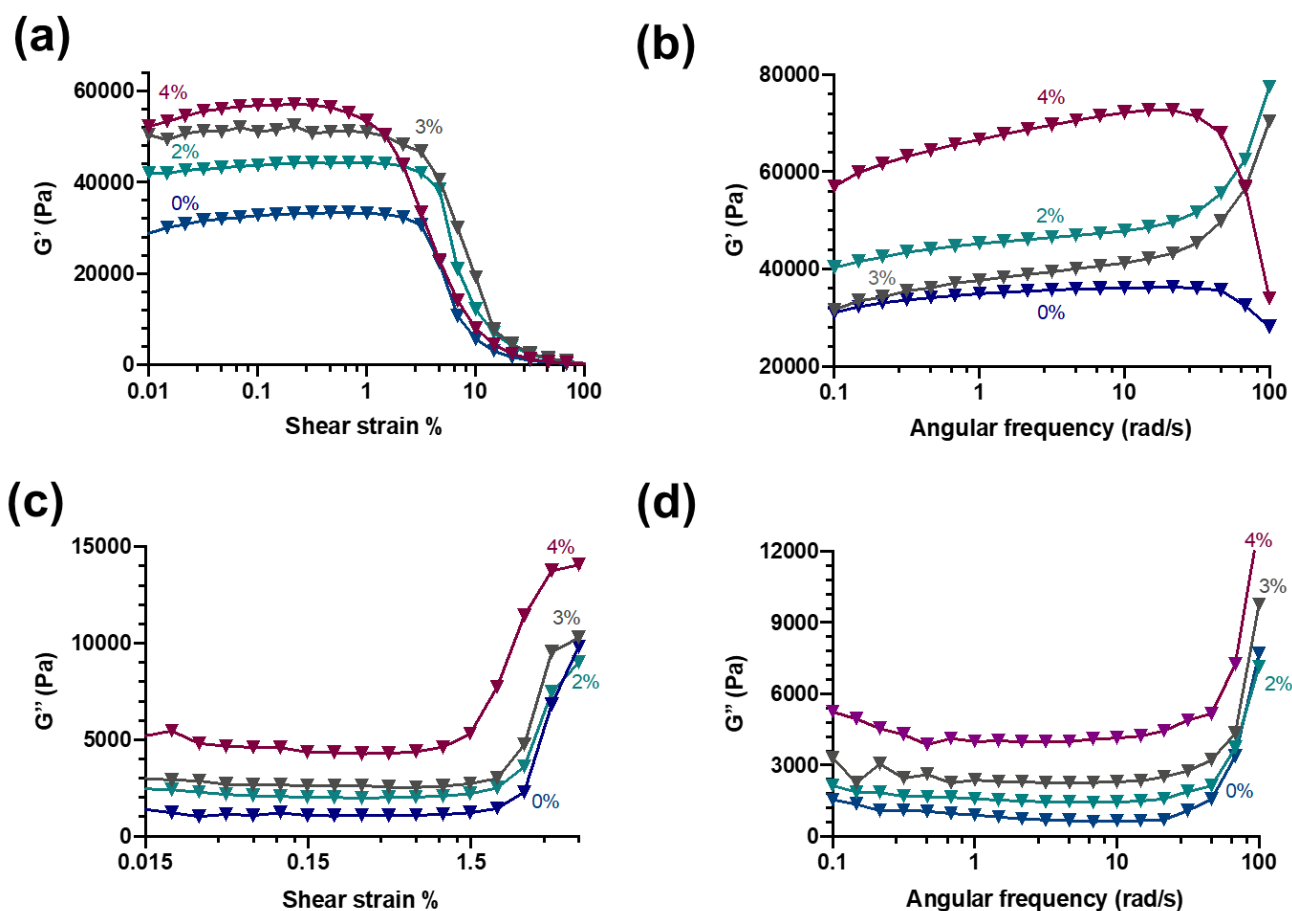

**Figure S2. Viscoelastic properties of GelMA-AlgMA hybrid hydrogels.** (a) Storage modulus and (b) loss modulus versus oscillatory shear strain (at angular frequency  $\sim 1 \text{ rad s}^{-1}$ ) and angular frequency (at oscillatory shear strain  $\sim 0.1\%$ ) for the hybrid hydrogels composed of GelMA (20% w/v) and varying concentrations of AlgMA.

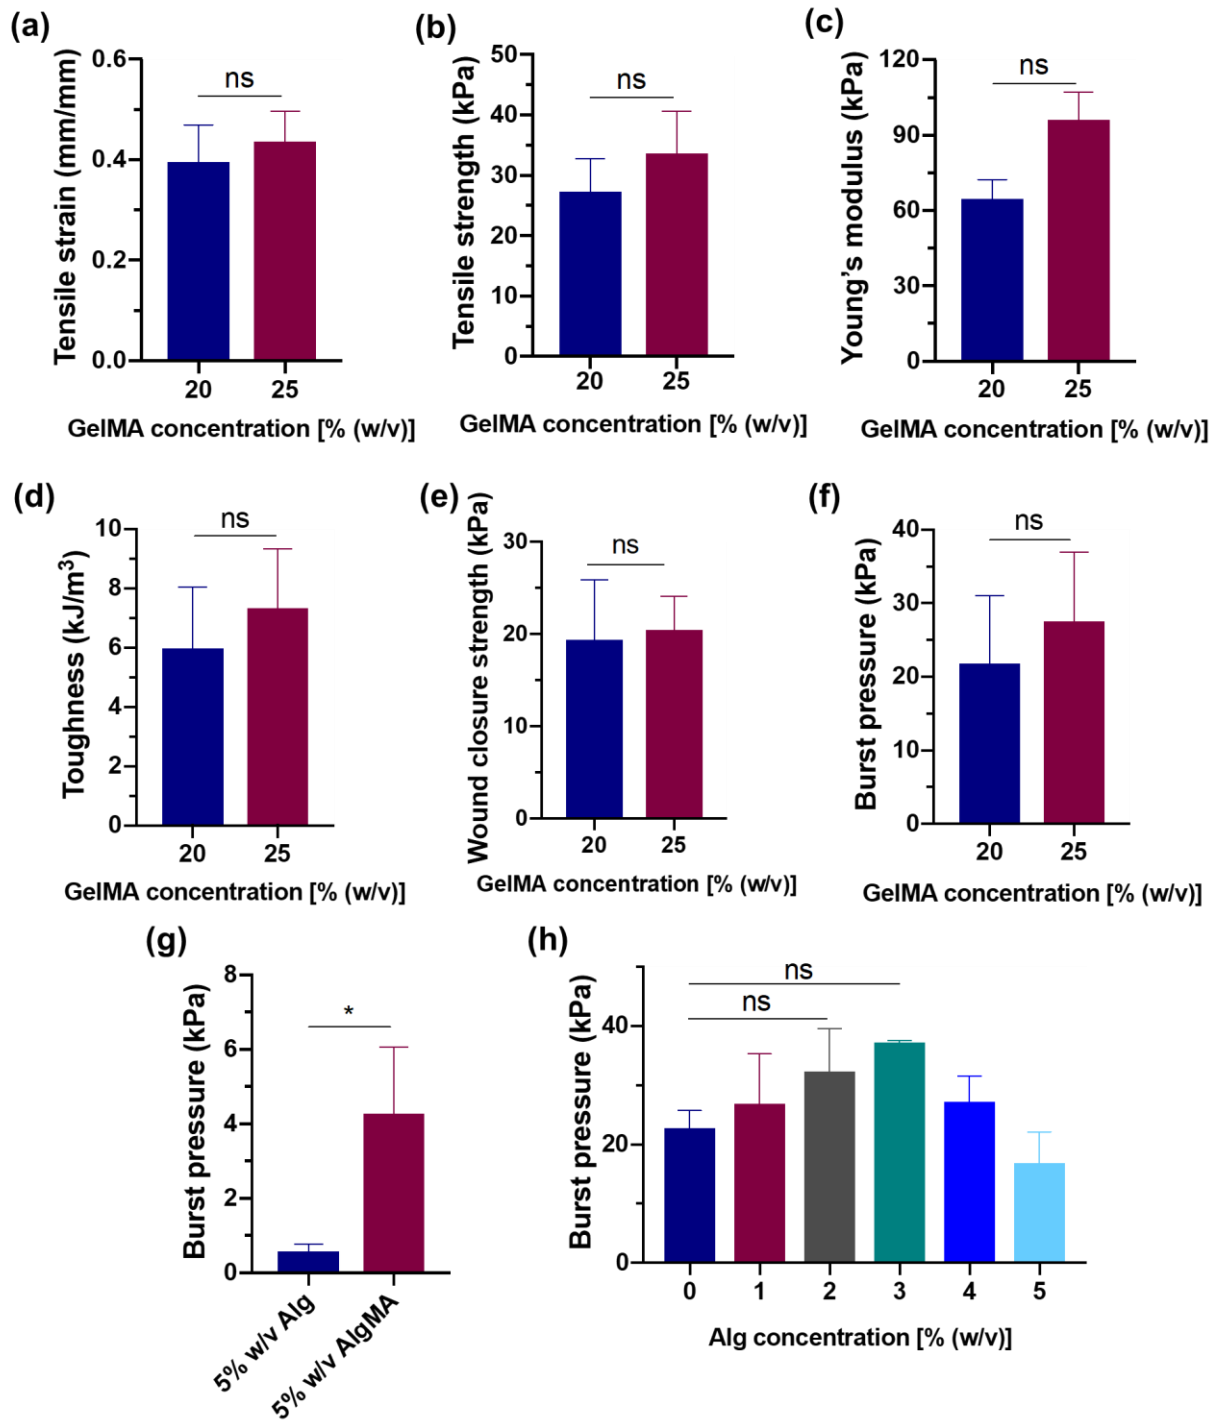

**Figure S3. Mechanical and adhesive properties of various biopolymeric systems.** (a) Tensile strain at break (b) tensile strength at break, (c) Young's modulus, (d) toughness, (e) wound closure strength, and (f) burst pressure of GelMA 20% compared to GelMA 25% showing no significant difference. (g)

Burst pressure of alginate (5%) compared to crosslinked AlgMA (5%). **(h)** Burst pressure of hybrid hydrogels made up of GelMA (25%) and varying concentrations of alginate. Data are reported as the mean values of at least 5 experiments  $\pm$  their standard deviation. The statistical analysis was done according to the methods explained in “Statistical analysis” section. Asterisks show the results that are statically significant with p-values less than 0.05 (\*).
